# Supplementary material for: Experimental and theoretical studies on glucose conversion in ethanol solution to 5-ethoxymethylfurfural and ethyl levulinate catalyzed by a Brønsted acid
Source: Royal Society of Chemistry journal article supplement (doi:10.1039/d1cp02986j), 2021-01-01
Supplement: d1cp02986j1.pdf [file d1cp02986j1.pdf]

## SUPPLEMENTARY MATERIAL

### Experimental and theoretical studies on glucose conversion in ethanol solution to

#### 5-Ethoxymethylfurfural and Ethyl Levulinate catalyzed by Brønsted acid

Shijie Wang <sup>a</sup>, Yihang Chen <sup>a</sup>, Yu Jia <sup>a</sup>, Guizhuan Xu <sup>a\*</sup>, Chun Chang <sup>b,c</sup>, Qianhui Guo <sup>a</sup>, Hongge Tao <sup>a\*</sup>, Caihong Zou <sup>a</sup>, Kai Li <sup>a</sup>

<sup>a</sup> College of Mechanical and Electrical Engineering, Henan Agricultural University, Henan Province, Zhengzhou 450002, China.

<sup>b</sup> School of Chemical Engineering and Energy, Zhengzhou University, Zhengzhou 450001, Henan, China.

<sup>c</sup> Henan Key Laboratory of Green Manufacturing of Biobased Chemicals, Puyang 457000, China.

\*Corresponding authors: xuguizhuan@126.com, thg0218@163.com, Tel.: +86 13653860867

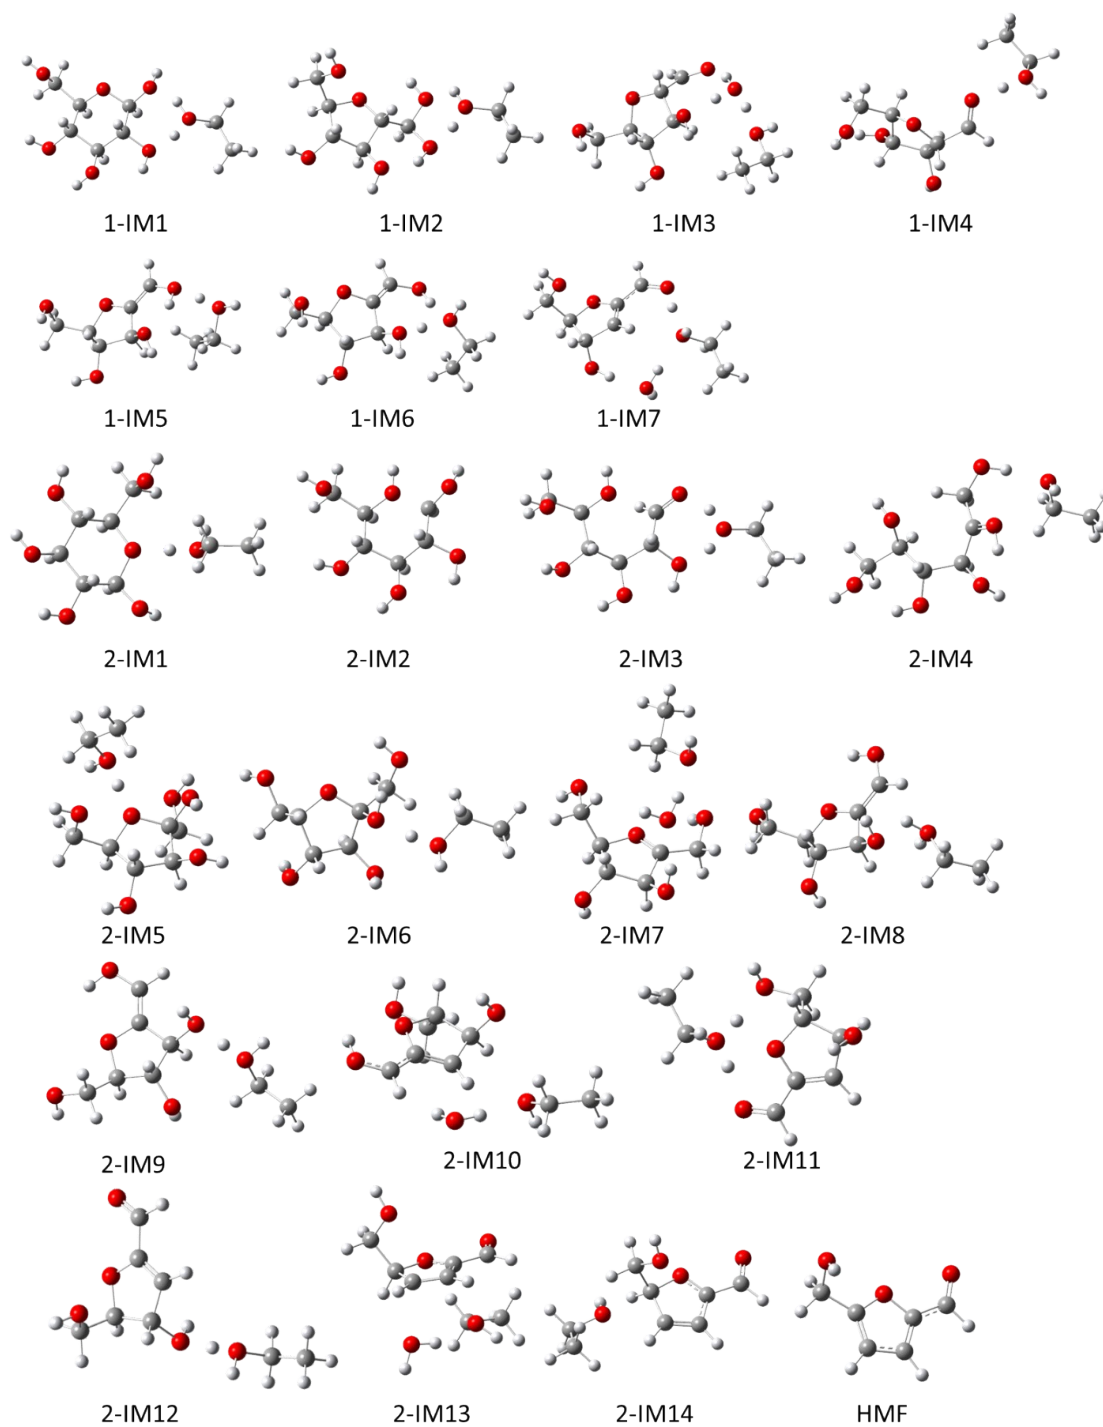

**Fig. S1.** The geometry structures of the reactants for glucose alcoholysis to HMF catalyzed by Brønsted acid in ethanol solution. Red: oxygen, gray: carbon, white: hydrogen.

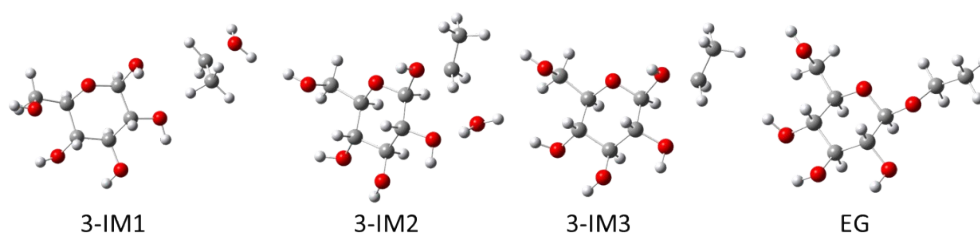

**Fig. S2.** The geometry structures of the reactants for glucose to EG catalyzed by Brønsted acid in ethanol solution. Red: oxygen, gray: carbon, white: hydrogen.

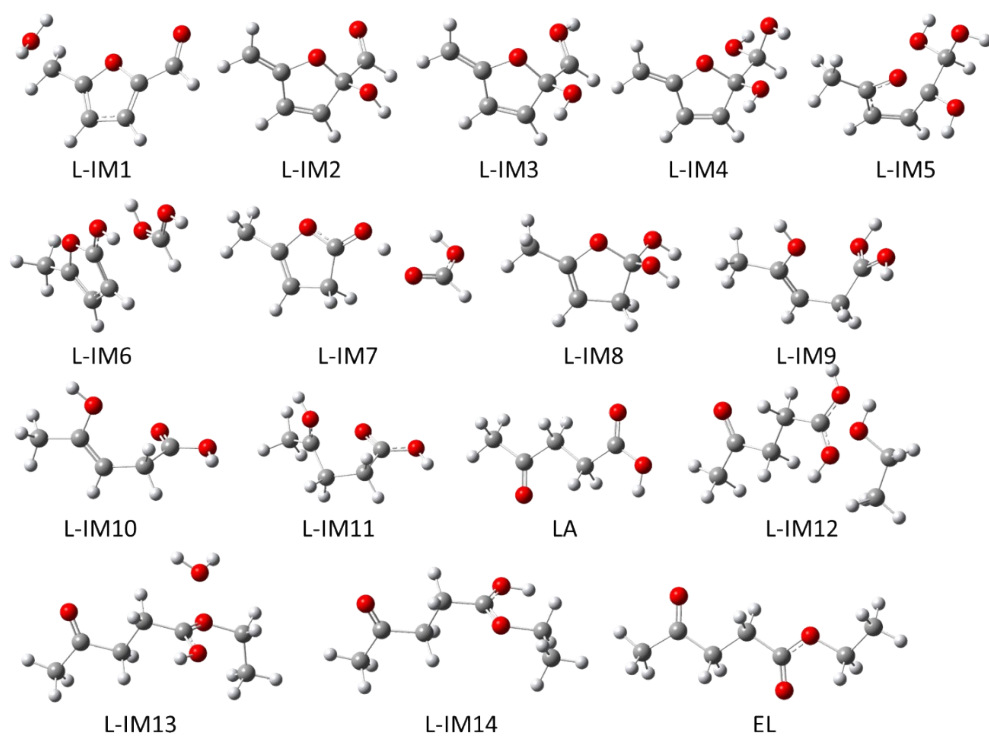

**Fig. S3.** The geometry structures of the reactants for HMF to EL through LA catalyzed by Brønsted acid in ethanol solution. Red: oxygen, gray: carbon, white: hydrogen.

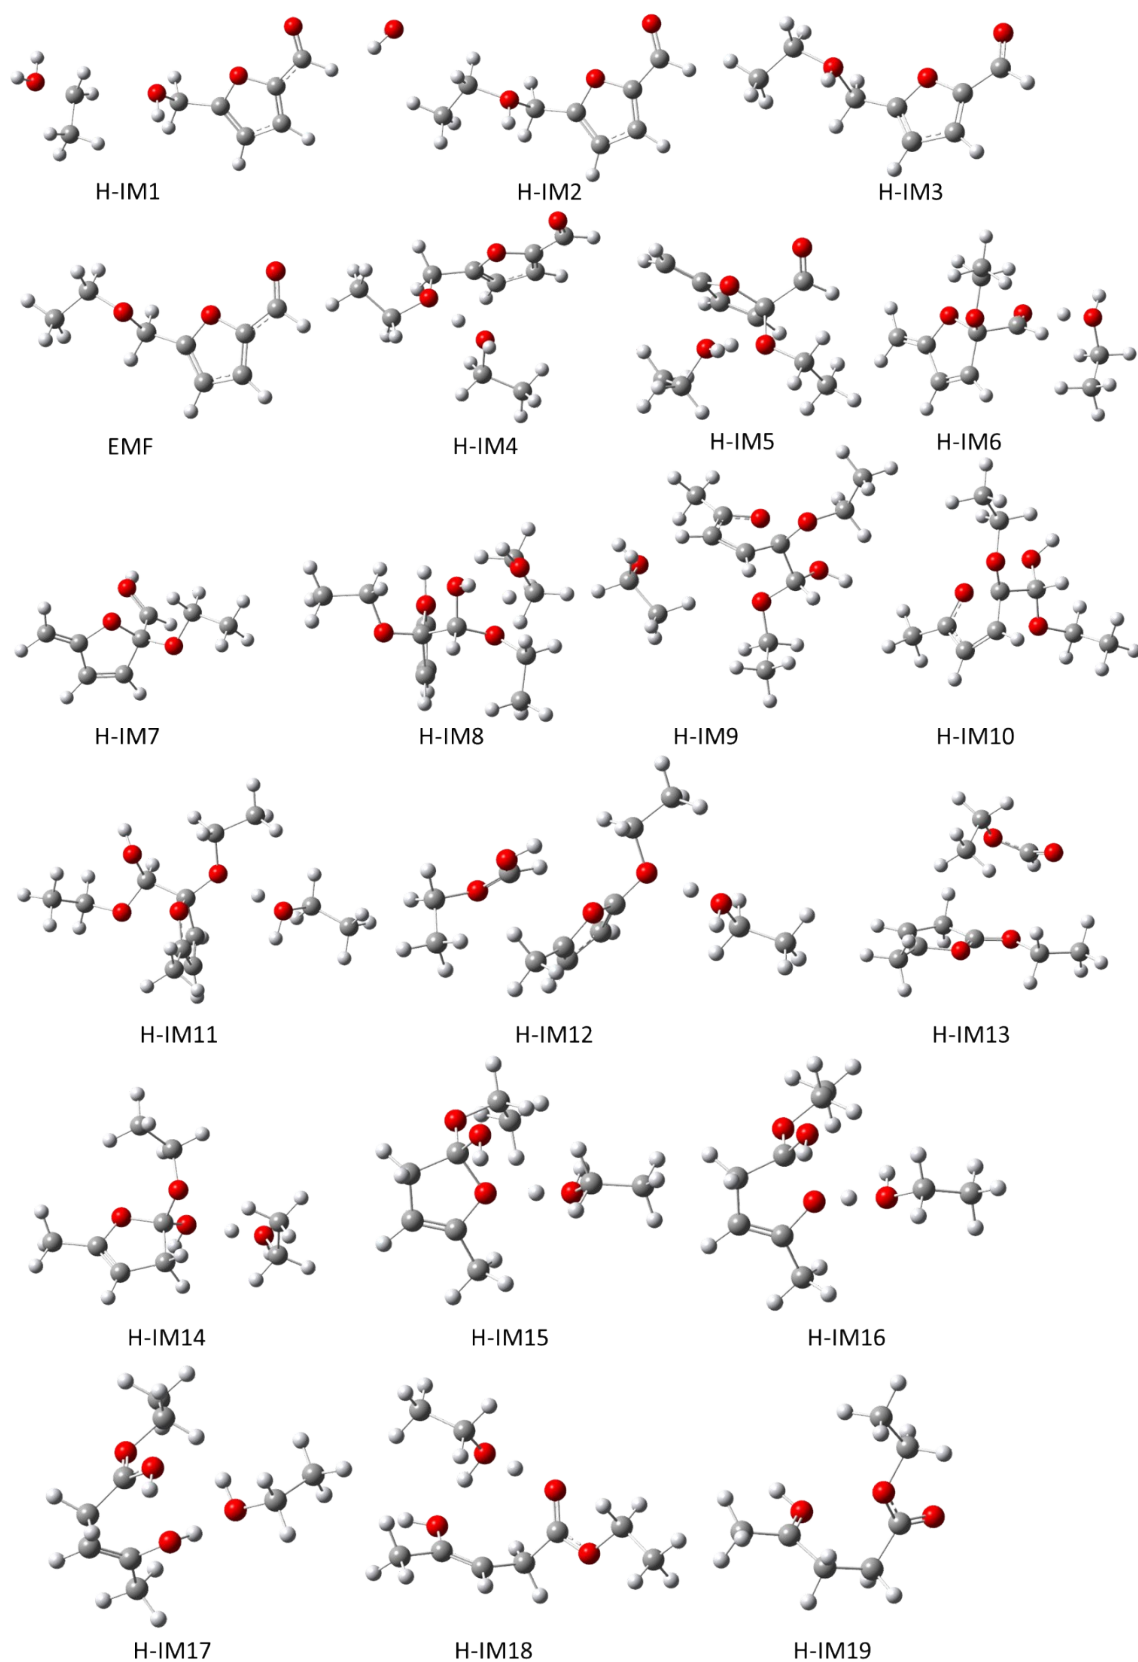

**Fig. S4.** The geometry structures of the reactants for HMF alcoholysis to EL though EMF catalyzed by Brønsted acid in ethanol solution. Red: oxygen, gray: carbon, white: hydrogen.
